# Supplementary material
Source: MDPI journal article supplement (https://www.mdpi.com/1424-2818/15/3/393)
Supplement: s1 [file s1]

## Supplementary Material

### Fantastic flatworms and where to find them: insights into intertidal polyclad flatworm distributions in southeastern Australian boulder beaches

Louise Tosetto, Justin M. McNab, Pat A. Hutchings, Jorge Rodríguez, Jane E. Williamson

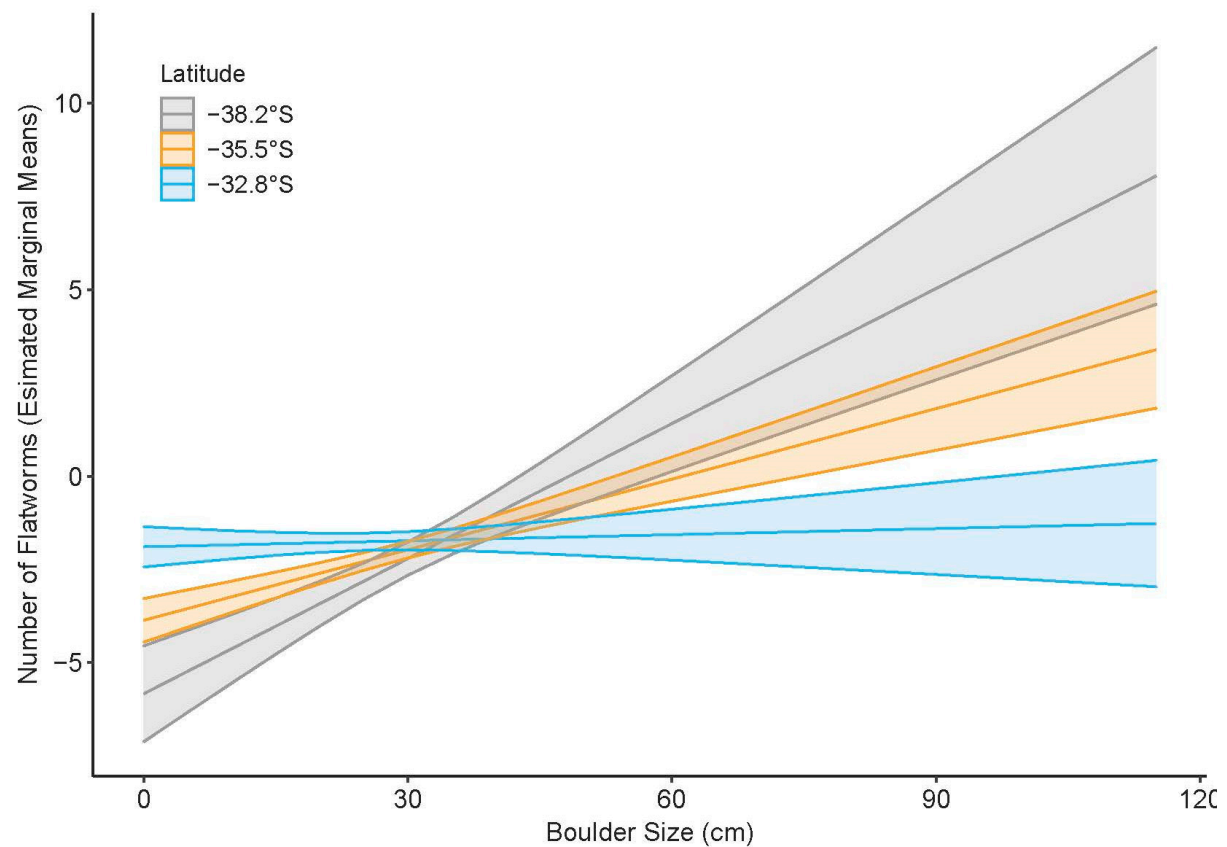

**Figure S1.** Mean flatworms (estimated marginal means) across differing latitudes and boulder sizes. Ribbons represent 95% confidence interval limits.
